# Supplementary material
Source: PubMed Central journal article supplement (PMC11181422)

576 **Figure 1-figure supplement 1. Transcriptional inhibition after irradiation and**  
577 **transcriptional restart after DNA repair in U2OS cells. A.** U2OS cells were either incubated  
578 with EU or not, as indicated, and were irradiated (10 Gy) or not as indicated, followed by  
579 detection of the EU by click chemistry of a fluorophore, and immunofluorescence staining of  
580 gamma H2AX in the same cells and the DNA was detected by Hoechst staining.

581

582 **Figure 1-figure supplement 2. Confirmation of knockdown of HIRA (A) and H3.3 (B).** The  
583 samples were from the same experiments shown in Figure 1.

584

585 **Figure 2-figure supplement 1. The mean intensities of the EU peaks shown in Figure 2D are**  
586 **indicated.** The mean value of each sample was calculated by Flowjo software.

587

588 **Figure 3-figure supplement 1. Nascent transcript levels before and after 30 minutes of IR.**

589 The samples from two independent experiments were used for the EU-seq and analyses in Fig. 3  
590 and 4.

591

592 **Figure 3-figure supplement 2. Screen shot from the UCSC browser of nascent transcripts.**

593 **A.** Nascent transcripts before and after IR over ribosomal DNA (rDNA). **B.** Nascent histone  
594 transcripts before and after IR over histone cluster 1.

595

596 **Figure 3-figure supplement 3. Validation of nascent transcript levels of DEGs from EU-**

597 **RNA seq by real-time quantitative RT-PCR.** Samples from three independent experiments

598 were used for the analyses. Ct value is presented to show the absolute amounts of EU labeled

599 RNA transcripts from the same number of cells before and after 30 minutes of IR (10 gray).

600 Significant difference after IR compared to before IR are indicated by asterisks, where \*\*

601 indicates  $p < 0.01$ , \* indicates  $p < 0.05$  and ns indicates non-significant by students T-test.

602

603 **Figure 5-figure supplement 1. CRISPR-Cas9 screen identifies genes promoting**

604 **transcriptional inhibition after IR.** A volcano plot of guide RNA changes between Eu high

605 cells and unsorted cells. Labeled genes are some of those that have  $P_{\text{adjust}} \leq 10^{-6}$ .

606

607 **Figure 5-figure supplement 2. Confirmation of knockdown of Nae1.** gEV is an empty vector.

608 The samples were from the same experiments shown in Figure 5D.

609

610 **Figure 6-figure supplement 1. Analysis of CUL4A and CUL4B depletion. A.** The western  
611 blot shows the CUL4A and CUL4B levels from the experiment shown in Fig. 6B. Additionally  
612 gRNAs were used to deplete CUL4A in cul4b cells and CUL4B in cul4a cells and their western  
613 blot analyses are also shown. **B.** The EU analysis of these double depleted cells is shown. **C.** Cell  
614 cycle analysis of the experiment shown in A and B and Fig. 6B.

615

616 **Figure 6-figure supplement 2. Cell cycle analysis of cells treated with MLN4924 and**  
617 **RO3306.** MLN4924 or RO3306 treatment leads cell cycle arrest in G<sub>2</sub> phase.

618

619 **Figure 7-figure supplement 1. Quantification of cells with TOPBP1 expression** before and  
620 after IR (10 Gy) in cells treated with MLN4924 and RO-3306. The samples were from the same  
621 experiments shown in Fig. 7F, 7G.

622

623 **Supplementary File 1.** Nascent RNA profiles of each gene using EU RNA-seq.

624

625 **Supplementary File 2.** Significantly enriched GO terms for up-regulated gene after irradiation.

626

627 **Supplementary File 3.** Significantly enriched GO terms for down-regulated genes after  
628 irradiation.

629

630 **Supplementary File 4.** Whole genome CRISPR-Cas9 screen detects the abundance of all  
631 gRNAs and target genes for EU high cells and unsorted cells.

632

633 **Figure 1-figure supplement 2 Source Data 1.** Original file for the Western blot analysis in  
634 Figure 1-Figure Supplement 1A (anti-HIRA and anti-GAPDH).

635

636 **Figure 1-figure supplement 2 Source Data 2.** PDF containing Figure 1-Figure Supplement 1A  
637 and original scans of the relevant Western blot analysis (anti-CUL4A, anti-CUL4B and anti-  
638 GAPDH) with highlighted bands and sample labels.

639

640 **Figure 1-figure supplement 2 Source Data 3.** Original file for the Western blot analysis in  
641 Figure 1-Figure Supplement 1B (anti-H3.3 and anti-GAPDH).

642

643 **Figure 1-figure supplement 2 Source Data 4.** PDF containing Figure 1-Figure Supplement 1B  
644 and original scans of the relevant Western blot analysis (anti-H3.3 and anti-GAPDH) with  
645 highlighted bands and sample labels.

646

647

648 **Figure 5-figure supplement 2 Source Data 1.** Original file for the Western blot analysis in  
649 Figure 5D (anti-Nae1 and anti-GAPDH).

650

651 **Figure 5-figure supplement 2 Source Data 2.** PDF of Western blot analysis in Figure 5D and  
652 original scans of the relevant Western blot analysis (anti-Nae1 and anti-GAPDH) with  
653 highlighted bands and sample labels.

654

655 **Figure 6 Source Data 1.** Original file for the Western blot analysis in Figure 6A (anti-CUL4A,  
656 anti-CUL4B and anti-GAPDH).

657

658 **Figure 6 Source Data 2.** PDF containing Figure 6A and original scans of the relevant Western  
659 blot analysis (anti-CUL4A, anti-CUL4B and anti-GAPDH) with highlighted bands and sample  
660 labels.

661

662 **Figure 6 Source Data 3.** Original file for the Western blot analysis in Figure 6C (anti-CUL4B,  
663 and anti-GAPDH).

664

665 **Figure 6 Source Data 4.** PDF containing Figure 6C and original scans of the relevant Western  
666 blot analysis (anti-CUL4B and anti-GAPDH) with highlighted bands and sample labels.

667

668 **Figure 6-figure supplement 1 Source Data 1.** Original file for the Western blot analysis in  
669 Figure 6-figure supplement 1A (anti-CUL4A, anti-CUL4B and anti-GAPDH).

670

671 **Figure 6-figure supplement 1 Source Data 2.** PDF containing Figure 6-figure supplement 1A  
672 and original scans of the relevant Western blot analysis (anti-CUL4A, anti-CUL4B and anti-  
673 GAPDH) with highlighted bands and sample labels.

Figure 1-figure supplement 1

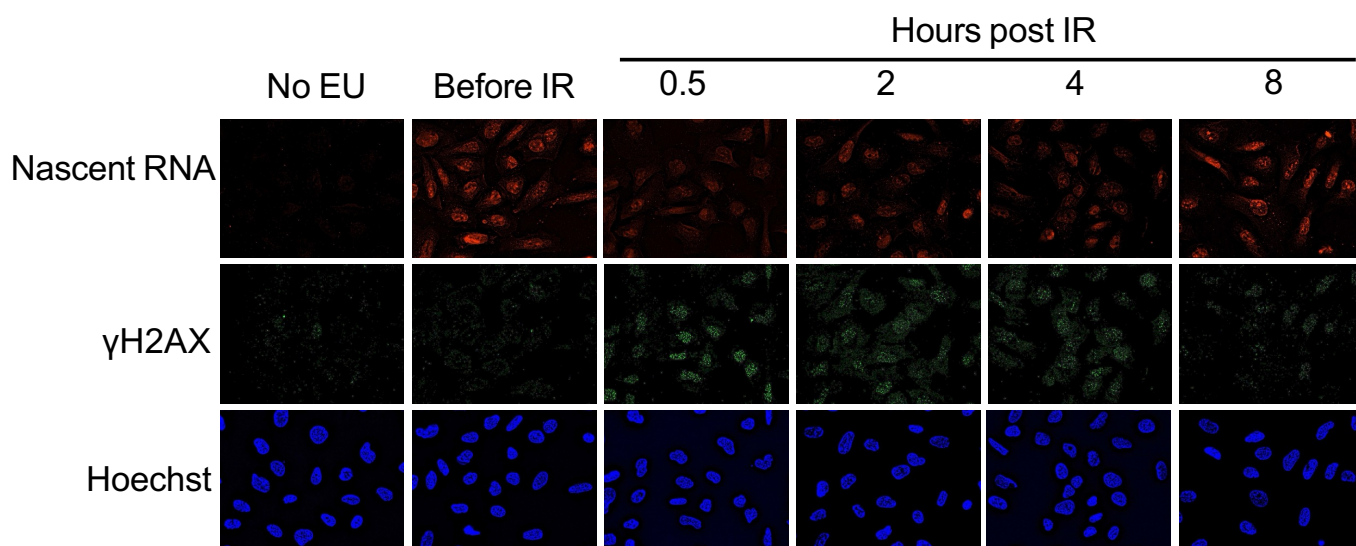

Figure 1-figure supplement 2

**A**

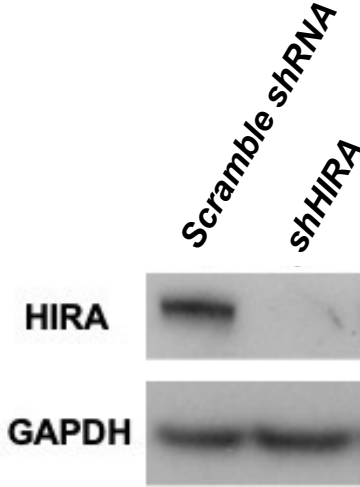

**B**

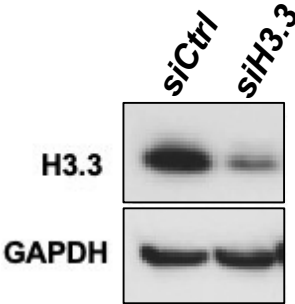

Figure 2-figure supplement 1

| Dose  | No EU | No IR | 15 m | 30 m | 1 h  | 2 h  | 4 h  |
|-------|-------|-------|------|------|------|------|------|
| 2 Gy  | 314   | 2690  | 1440 | 1261 | 1282 | 1640 | 2349 |
| 5 Gy  | 314   | 2690  | 1379 | 1169 | 1101 | 1345 | 2004 |
| 10 Gy | 314   | 2690  | 1224 | 1094 | 1053 | 1347 | 1803 |



Figure 3-figure supplement 1

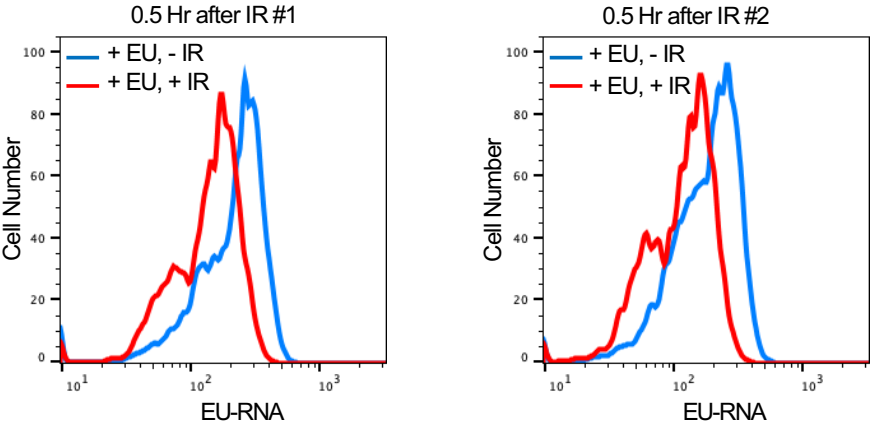

Figure 3-figure supplement 2

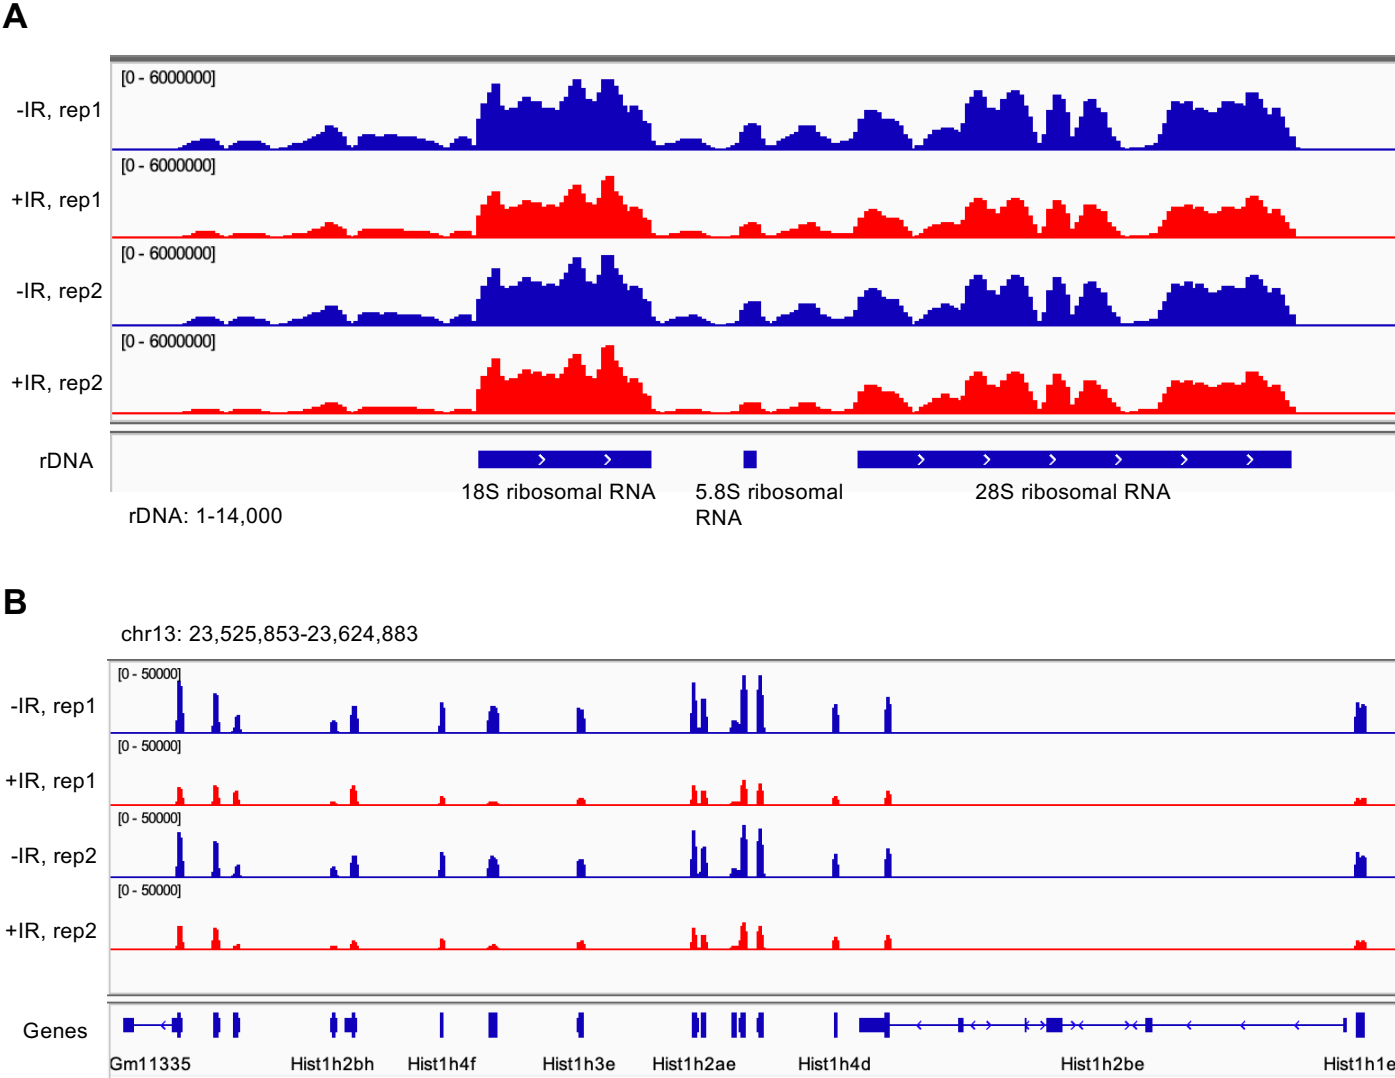

Figure 3-figure supplement 3

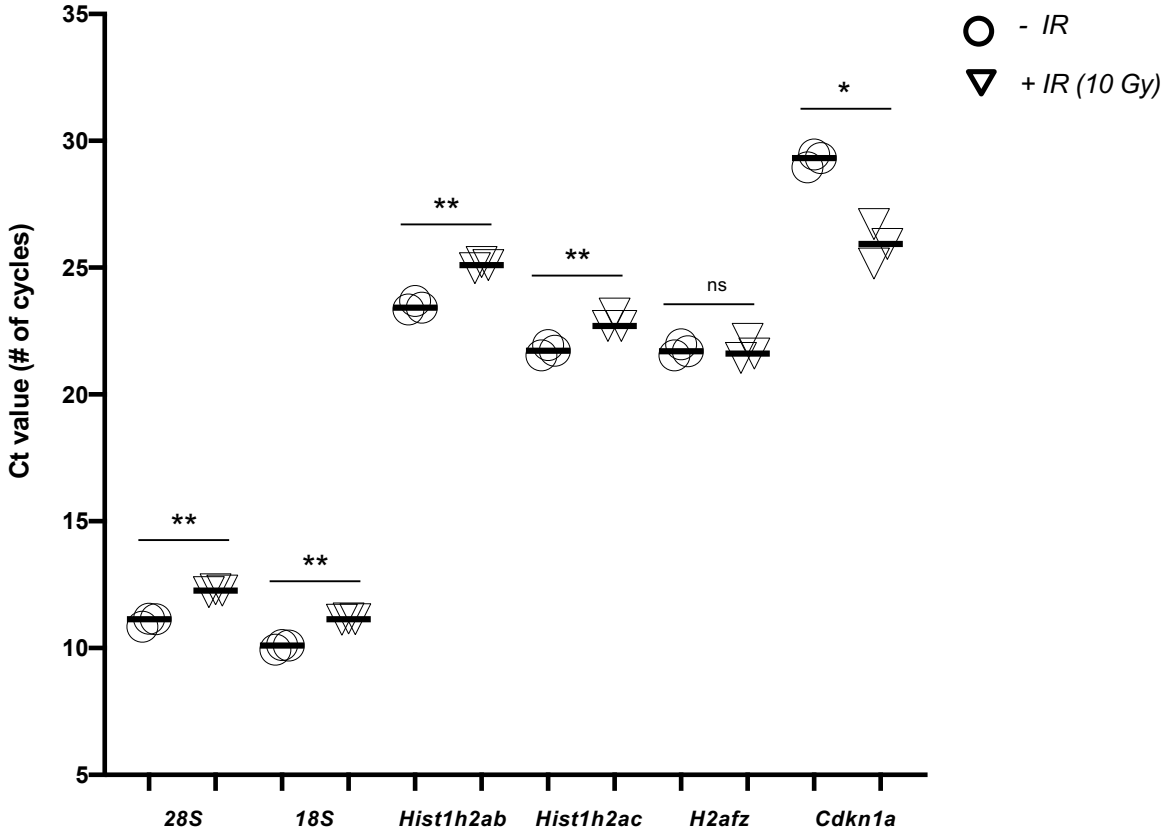

Figure 5-figure supplement 1

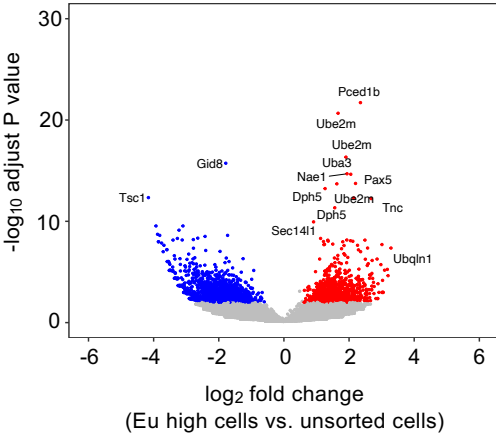

Figure 5-figure supplement 2

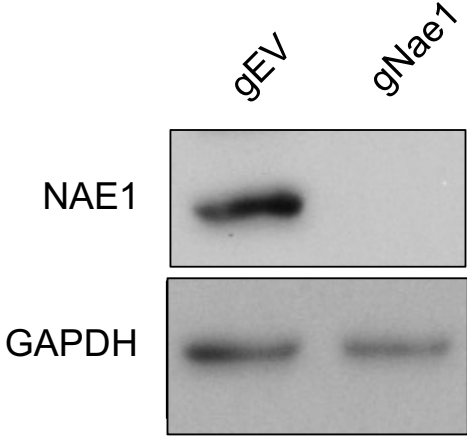

# Figure 6-figure supplement 1

**A**

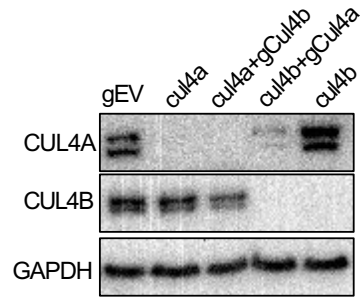

**B**

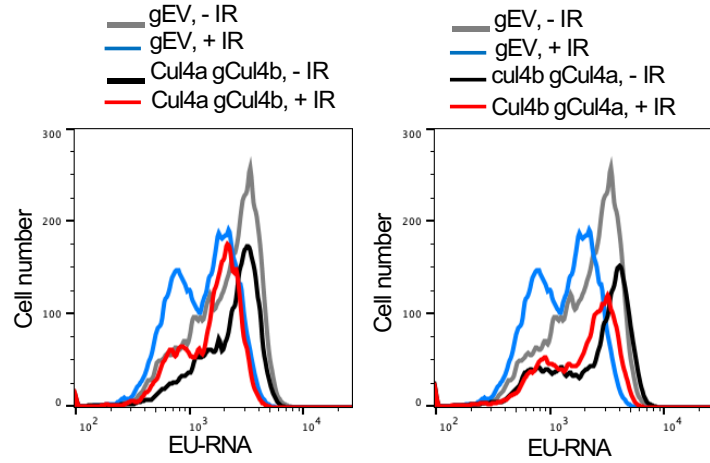

**C**

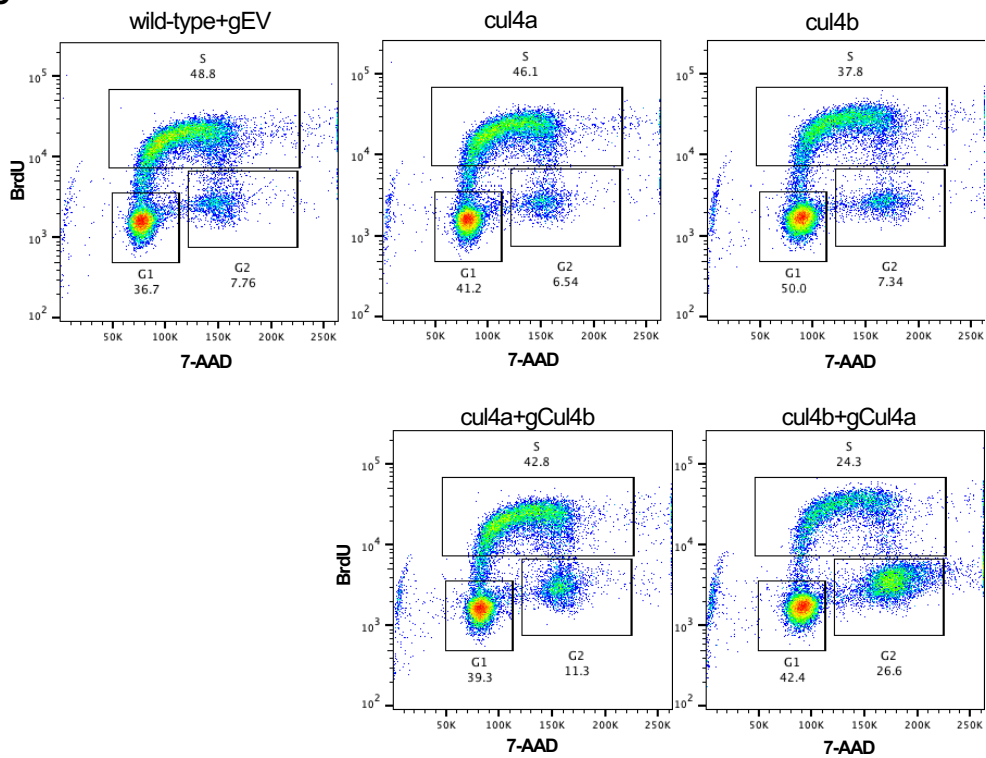

Figure 6-figure supplement 2

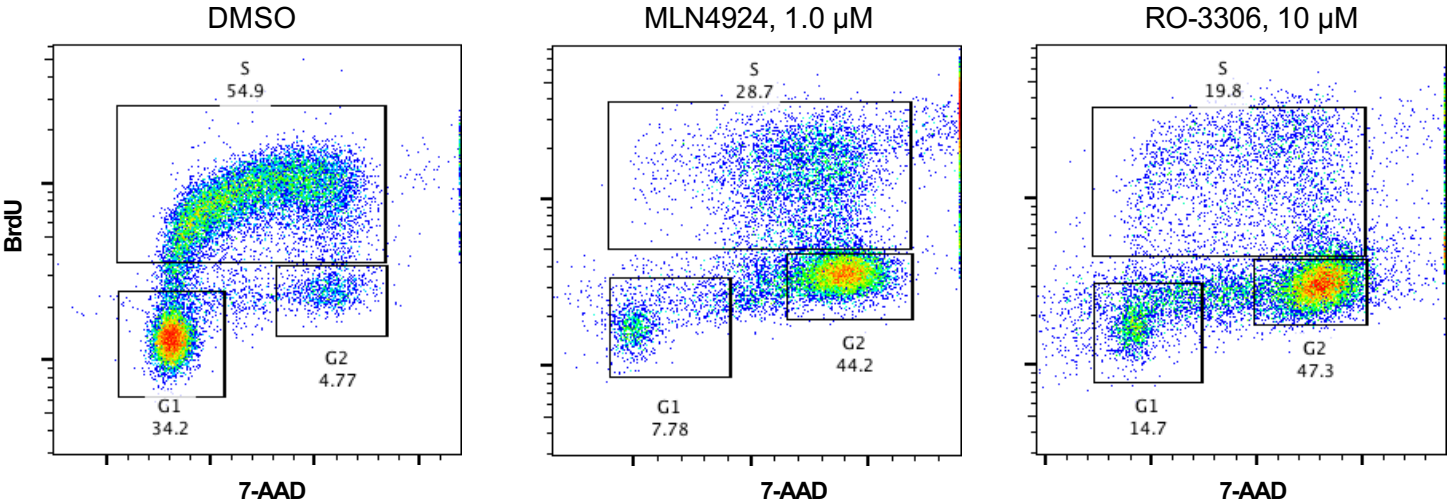

Figure 7-figure supplement 1

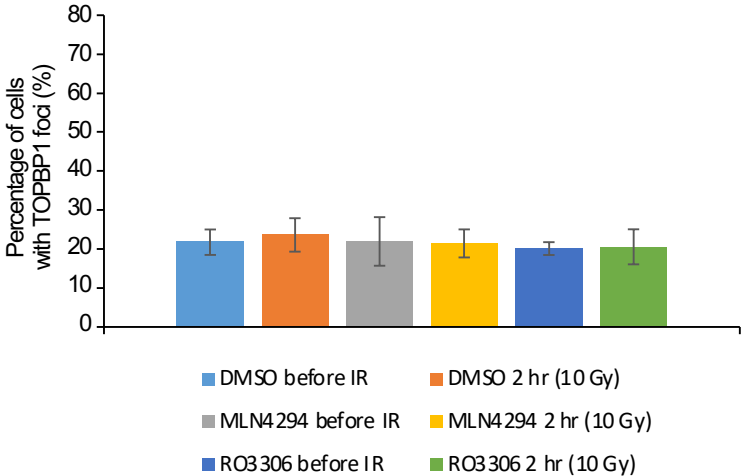

Supplement: NIHPP2023.11.20.567799V2-supplement-1.pdf [file NIHPP2023.11.20.567799V2-supplement-1.pdf]
